# Supplementary material for: Gamma/delta T cells as cellular vehicles for anti-tumor immunity
Source: Frontiers journal article supplement (doi:10.3389/fimmu.2023.1282758), 2024-01-11
Supplement: Table_1.pdf [file Table_1.pdf]

## Gamma/delta T cells in immunotherapy

**Supplemental table.** Ongoing and past clinical trials involving direct cellular administration of unmodified and modified  $\gamma\delta$  T cells, including study outcome (if available).

| ClinicalTrials.gov Identifier | Year | Status    | Cell type(s) infused                                                                                                                                                          | Donor source | Cell source | Modification of cells, if applicable | Trial phase    | No. of cells infused per patient                                                                               | No. of infusions                         | Condition/disease | Outcome                                                                                                                                                                             | Reference (if available) | Organiser |
|-------------------------------|------|-----------|-------------------------------------------------------------------------------------------------------------------------------------------------------------------------------|--------------|-------------|--------------------------------------|----------------|----------------------------------------------------------------------------------------------------------------|------------------------------------------|-------------------|-------------------------------------------------------------------------------------------------------------------------------------------------------------------------------------|--------------------------|-----------|
|                               | 2002 | Completed | Enriched in V $\gamma$ 9V $\delta$ 2 T cells (Innacell <sup>TM</sup> ; single BrHPP stimulation followed by 2-week expansion in presence of IL-2 in vitro); infused with IL-2 | Autologous   | PB          | nil                                  | 1              | 1 x 10 <sup>9</sup> , 4 x 10 <sup>9</sup> or 8 x 10 <sup>9</sup> (no intra-patient dose escalation)            | 3 (at 3-week interval)                   | Metastatic RCC    | n = 10<br><u>Efficacy</u><br>6 SD: 60%<br>4 PD: 40%<br>PFS: 25.7 weeks (5-111 weeks)<br><u>Safety and toxicity</u><br>DLT: 1 out of 3 patients treated at 8 x 10 <sup>9</sup> cells | (1)                      |           |
|                               | 2005 | Completed | Activated by 2-methyl-3-butenyl-1-pyrophosphate and expansion in the presence of IL-2 until day 14                                                                            | Autologous   | PB          | nil                                  | Not applicable | ranged from 5 x 10 <sup>6</sup> to 3.6 x 10 <sup>9</sup> depending on how much $\gamma\delta$ T cells expanded | 6-12 for 12 weeks (1 or 2-week interval) | Advanced RCC      | n=7<br><u>Efficacy</u><br>3 PR: 43%<br><u>Safety and toxicity</u><br>No serious adverse events observed.                                                                            | (2)                      |           |
|                               | 2006 | Completed | Expanded using IL-2 and zoledronate                                                                                                                                           | Autologous   | PB          | nil                                  | 1              | 1 x 10 <sup>7</sup> to 7.2 x 10 <sup>9</sup>                                                                   | 3 - 12 infusions (2-week interval)       | NSCLC             | n=10<br><u>Efficacy</u><br>3 SD: 30%<br>5 PD: 50%<br><u>Safety and toxicity</u><br>No serious adverse events observed.                                                              | (3)                      |           |

## Gamma/delta T cells in immunotherapy

| ClinicalTrials.gov Identifier | Year | Status    | Cell type(s) infused                                                                                                                     | Donor source | Cell source | Modification of cells, if applicable | Trial phase | No. of cells infused per patient               | No. of infusions                   | Condition/disease                                     | Outcome                                                                                                                                                                                                                                                          | Reference (if available) | Organiser                                                        |
|-------------------------------|------|-----------|------------------------------------------------------------------------------------------------------------------------------------------|--------------|-------------|--------------------------------------|-------------|------------------------------------------------|------------------------------------|-------------------------------------------------------|------------------------------------------------------------------------------------------------------------------------------------------------------------------------------------------------------------------------------------------------------------------|--------------------------|------------------------------------------------------------------|
|                               | 2011 | Completed | Enriched in Vγ9Vδ2 T cells (zoledronate stimulation followed by 2-week expansion in presence of IL-2 in vitro); infused with zoledronate | Autologous   | PB          | nil                                  | 1           | 0.5 x 10 <sup>7</sup> to 2.8 x 10 <sup>9</sup> | 6-8                                | Breast cancer, cervical cancer and other solid tumors | n=18<br><u>Efficacy</u><br>1 CR: 6%<br>2 PR: 11%<br>3 SD: 17%<br>PR and CR achieved with co-treatment.<br><u>Safety and toxicity</u><br>No DLT observed.                                                                                                         | (4)                      |                                                                  |
| NCT02418481                   | 2015 | Completed | γδ T cells with or without DC-CIK cells                                                                                                  | Autologous   | PB          | nil                                  | 1 & 2       | Not published                                  | Not published                      | Breast cancer                                         |                                                                                                                                                                                                                                                                  |                          | Fuda Cancer Hospital, Guangzhou<br>Jinan University<br>Guangzhou |
| NCT02425735                   | 2015 | Completed | Vγ9Vδ2 T cells with or without DC-CIK cells                                                                                              | Autologous   | PB          | nil                                  | 1 & 2       | 4 × 10 <sup>8</sup> cells (1 CCA patient)      | 1 CCA patient received 8 infusions | Hepatocellular liver cancer (including CCA)           | 1 case study published (allogeneic).<br><u>Efficacy</u><br>Positively regulated peripheral immune functions of the patient, depleted tumor activity, improved quality of life, and prolonged his life span.<br><u>Safety and toxicity</u><br>No adverse effects. | (5)                      | Fuda Cancer Hospital, Guangzhou<br>Jinan University<br>Guangzhou |
| NCT02425748                   | 2017 | Completed | γδ T cells with or without DC-CIK cells                                                                                                  | Autologous   | PB          | nil                                  | 1 & 2       | Not published                                  | Not published                      | Non small lung cancer (without EGFR mutation)         | No published results.                                                                                                                                                                                                                                            |                          | Fuda Cancer Hospital, Guangzhou<br>Jinan University<br>Guangzhou |

## Gamma/delta T cells in immunotherapy

| ClinicalTrials.gov Identifier | Year | Status    | Cell type(s) infused                                         | Donor source | Cell source | Modification of cells, if applicable | Trial phase | No. of cells infused per patient | No. of infusions | Condition/disease                  | Outcome                                                                                                                                                                                                                                                                                                                                              | Reference (if available) | Organiser                                                        |
|-------------------------------|------|-----------|--------------------------------------------------------------|--------------|-------------|--------------------------------------|-------------|----------------------------------|------------------|------------------------------------|------------------------------------------------------------------------------------------------------------------------------------------------------------------------------------------------------------------------------------------------------------------------------------------------------------------------------------------------------|--------------------------|------------------------------------------------------------------|
| NCT03180437                   | 2017 | Completed | V $\gamma$ 9V $\delta$ 2 T cells with or without IRE surgery | Allogeneic   | PB          | nil                                  | 1 & 2       | Not published                    | Single or 6      | Locally advanced pancreatic cancer | n=62<br><u>Efficacy</u><br>Median OS: 14.5 months compared to 11 months without $\gamma\delta$ T infusion<br>Median PFS: 11 months compared to 8.5 months without $\gamma\delta$ T infusion<br><u>Safety and toxicity</u><br>14 serious adverse events (grade 3 and 4) observed that were likely due to IRE treatment and not $\gamma\delta$ T cells | (6)                      | Fuda Cancer Hospital, Guangzhou<br>Jinan University<br>Guangzhou |

## Gamma/delta T cells in immunotherapy

| ClinicalTrials.gov Identifier                       | Year | Status    | Cell type(s) infused                                                                | Donor source | Cell source | Modification of cells, if applicable | Trial phase | No. of cells infused per patient | No. of infusions | Condition/disease                                       | Outcome                                                                                                                                                                                                                                                                                                                                                                                                           | Reference (if available) | Organiser                                                        |
|-----------------------------------------------------|------|-----------|-------------------------------------------------------------------------------------|--------------|-------------|--------------------------------------|-------------|----------------------------------|------------------|---------------------------------------------------------|-------------------------------------------------------------------------------------------------------------------------------------------------------------------------------------------------------------------------------------------------------------------------------------------------------------------------------------------------------------------------------------------------------------------|--------------------------|------------------------------------------------------------------|
| NCT03183206<br>,<br>NCT03183219<br>,<br>NCT03183232 | 2017 | Completed | Vγ9Vδ2 T cells expanded using zoledronate, IL-2, IL-15 and vitamin C for 12-14 days | Autologous   | PB          | nil                                  | 1 & 2       | Not published                    | Not published    | Breast cancer, liver cancer & lung cancer, respectively | <p>n=132</p> <p><u>Efficacy</u></p> <p>18 patients (13.6%) showed response and prolonged survival</p> <p>Median OS (liver cancer patients): 23.1 months compared to 8.1 months in control group</p> <p>Median OS (lung cancer patients): 19.1 months compared to 9.1 months in control group</p> <p><u>Safety and toxicity</u></p> <p>No significant adverse events (immune rejection, GvHD or CRS) observed.</p> | (7)                      | Fuda Cancer Hospital, Guangzhou<br>Jinan University<br>Guangzhou |

## Gamma/delta T cells in immunotherapy

| ClinicalTrials.gov Identifier | Year | Status     | Cell type(s) infused                                                                      | Donor source                                         | Cell source | Modification of cells, if applicable | Trial phase   | No. of cells infused per patient                                                                               | No. of infusions                                   | Condition/disease                                    | Outcome                                                                                                                                                                                                           | Reference (if available) | Organiser                                                                                                                                              |
|-------------------------------|------|------------|-------------------------------------------------------------------------------------------|------------------------------------------------------|-------------|--------------------------------------|---------------|----------------------------------------------------------------------------------------------------------------|----------------------------------------------------|------------------------------------------------------|-------------------------------------------------------------------------------------------------------------------------------------------------------------------------------------------------------------------|--------------------------|--------------------------------------------------------------------------------------------------------------------------------------------------------|
| NCT03790072                   | 2018 | Completed  | Ex vivo expanded V $\gamma$ 9V $\delta$ 2 T cells (OmnImmune®) using zoledronate and IL-2 | Allogeneic (matched or haploidentical family donors) | PB          | nil                                  | 1 & 2         | 3 cohorts (10 <sup>6</sup> , 10 <sup>7</sup> , 10 <sup>8</sup> cells/kg)                                       | Single                                             | AML                                                  | n=7<br><u>Efficacy</u><br>1 CR: 14%<br>1 SD: 14%<br>1 MLFS: 14%<br><u>Safety and toxicity</u><br>No DLT and significant adverse effect (GvHD or neurotoxicity) observed. 1 patient suffered possible grade 1 CRS. | (8)                      | TC BioPharm                                                                                                                                            |
| NCT04696705                   | 2020 | Recruiting | Ex-vivo expanded $\gamma\delta$ T cells                                                   | Allogeneic (blood-related donor)                     | PB          | nil                                  | Early phase 1 | Dose escalation, 1 $\times$ 10 <sup>7</sup> , 3 $\times$ 10 <sup>7</sup> , 9 $\times$ 10 <sup>7</sup> cells/kg | 2 cycles x 2 infusions per cycle (14 day interval) | NHL, PTCL                                            | No published results.                                                                                                                                                                                             |                          | Institute of Hematology & Blood Diseases Hospital<br>Beijing GD Initiative<br>Cell Therapy Technology Co., Ltd.<br>Chinese Academy of Medical Sciences |
| NCT04702841                   | 2020 | Recruiting | CAR $\gamma\delta$ T cells                                                                | Autologous                                           | PB          | CD7 CAR                              | Early phase 1 | 0.2-5 $\times$ 10 <sup>6</sup> cells/kg                                                                        | Single                                             | R/r CD7 <sup>+</sup> T cell-derived malignant tumors | No published results.                                                                                                                                                                                             |                          | PersonGen BioTherapeutics (Suzhou) Co., Ltd.<br>Anhui Provincial Hospital                                                                              |

## Gamma/delta T cells in immunotherapy

| ClinicalTrials.gov Identifier | Year | Status     | Cell type(s) infused                                                                    | Donor source                       | Cell source | Modification of cells, if applicable    | Trial phase | No. of cells infused per patient                                                                                                                     | No. of infusions                      | Condition/disease       | Outcome                                                                                                                                                                                                                                                                                                    | Reference (if available)                                                                                                                                                                                                                                                                                                                                                                                                    | Organiser                                           |
|-------------------------------|------|------------|-----------------------------------------------------------------------------------------|------------------------------------|-------------|-----------------------------------------|-------------|------------------------------------------------------------------------------------------------------------------------------------------------------|---------------------------------------|-------------------------|------------------------------------------------------------------------------------------------------------------------------------------------------------------------------------------------------------------------------------------------------------------------------------------------------------|-----------------------------------------------------------------------------------------------------------------------------------------------------------------------------------------------------------------------------------------------------------------------------------------------------------------------------------------------------------------------------------------------------------------------------|-----------------------------------------------------|
| NCT03533816                   | 2020 | Recruiting | Expanded/activated $\gamma\delta$ T cell, followed by depletion of ab T-cells (INB-100) | Allogeneic (haploidentical donors) | PB          | nil                                     | 1           | 1 x 10 <sup>6</sup> cells/kg tested in 3 patients other planned dosed: 3 x 10 <sup>6</sup> , or 10 x 10 <sup>6</sup> cells/kg MTD at expansion phase | Single                                | AML, CML, ALL, MDS      | n=7<br><u>Efficacy</u><br>7 CR: 100%<br>PFS: 2.6 - 36 months<br><u>Safety and toxicity</u><br>No DLT observed. All patients experienced low grade (1-2) GvHD                                                                                                                                               | <a href="https://investors.in8bio.com/news-releases/news-release-details/in8bio-presents-positive-new-inb-100-data-showing-long-term">https://investors.in8bio.com/news-releases/news-release-details/in8bio-presents-positive-new-inb-100-data-showing-long-term</a>                                                                                                                                                       | University of Kansas Medical Center and IN8bio Inc. |
| NCT04165941                   | 2020 | Recruiting | $\gamma\delta$ T cells (activated and gene modified) (INB-200)                          | Autologous                         | PB          | MGMT-gene modified to be drug resistant | 1           | 1 x 10 <sup>7</sup>                                                                                                                                  | 3 cohorts: Single or 3 or 6 infusions | Glioblastoma multiforme | n=8<br><u>Efficacy</u><br>Cohort 1 (single dose)<br>PFS: 7.4-11.9 months<br>OS: 9.6-17.7 months<br><br>Cohort 2 (3 doses)<br>PFS: 19.4-23.5 months<br><u>Safety and toxicity</u><br>No DLT and serious adverse events (CRS and ICANS) observed. Some grade 1-2 treatment emergent adverse events observed. | (9)<br><a href="https://meetings.asco.org/abstracts-presentations/219950">https://meetings.asco.org/abstracts-presentations/219950</a> (presented in Jun 2023)<br><a href="https://investors.in8bio.com/news-releases/news-release-details/in8bio-announces-positive-inb-200-phase-1-data-update">https://investors.in8bio.com/news-releases/news-release-details/in8bio-announces-positive-inb-200-phase-1-data-update</a> | IN8bio Inc.                                         |

## Gamma/delta T cells in immunotherapy

| ClinicalTrials.gov Identifier | Year | Status     | Cell type(s) infused                                                               | Donor source | Cell source | Modification of cells, if applicable | Trial phase | No. of cells infused per patient                                                                                                                                                                                                                                                                                                                              | No. of infusions                                                                                                                                                                                                       | Condition/disease | Outcome               | Reference (if available) | Organiser                                                         |
|-------------------------------|------|------------|------------------------------------------------------------------------------------|--------------|-------------|--------------------------------------|-------------|---------------------------------------------------------------------------------------------------------------------------------------------------------------------------------------------------------------------------------------------------------------------------------------------------------------------------------------------------------------|------------------------------------------------------------------------------------------------------------------------------------------------------------------------------------------------------------------------|-------------------|-----------------------|--------------------------|-------------------------------------------------------------------|
| NCT04990063                   | 2021 | Recruiting | Tumor killer cells: mixed cocultures of NK cells & $\gamma\delta$ T cells          | Autologous   | PB          | nil                                  | 1           | Dose escalation starts at $1 \times 10^8$ cells/kg.                                                                                                                                                                                                                                                                                                           | After the safety assurance of the initial administration, the next course, up to 8 courses, is resumed and the dose maybe increased subsequently at the discretion of the investigators, or reduced for safety reason. | Advanced NSCLC    | No published results. |                          | Tang-Du Hospital<br>Shanghai Biomed-union Biotechnology Co., Ltd. |
| NCT05015426                   | 2021 | Recruiting | $\gamma\delta$ T cells (Artificial Antigen Presenting Cell-expanded donor T cells) | Allogeneic   | Not stated  | nil                                  | 1           | Dose level -1: $1.0 \times 10^6$ cells/kg (0.75- $1.25 \times 10^6$ cells/kg) *MTD to be determined.<br>Dose level 1: $5.0 \times 10^6$ cells/kg (3.75- $6.25 \times 10^6$ cells/kg)<br>Dose level 2: $2.5 \times 10^7$ cells/kg (1.875- $3.125 \times 10^7$ cells/kg)<br>Dose level 3: $1.0 \times 10^8$ cells/kg (0.75- $1.25 \times 10^8$ cells/kg)<br>MTD | Single                                                                                                                                                                                                                 | AML               | No published results. |                          | H. Lee Moffitt Cancer Center and Research Institute               |

## Gamma/delta T cells in immunotherapy

| ClinicalTrials.gov Identifier | Year | Status     | Cell type(s) infused                                                                               | Donor source | Cell source | Modification of cells, if applicable | Trial phase | No. of cells infused per patient                                                                                                                                                                                          | No. of infusions                       | Condition/disease                                                                                | Outcome                                                                                                                                                 | Reference (if available)                                                                                                                                                                                                                                                                                                                                                                                                                           | Organiser                    |
|-------------------------------|------|------------|----------------------------------------------------------------------------------------------------|--------------|-------------|--------------------------------------|-------------|---------------------------------------------------------------------------------------------------------------------------------------------------------------------------------------------------------------------------|----------------------------------------|--------------------------------------------------------------------------------------------------|---------------------------------------------------------------------------------------------------------------------------------------------------------|----------------------------------------------------------------------------------------------------------------------------------------------------------------------------------------------------------------------------------------------------------------------------------------------------------------------------------------------------------------------------------------------------------------------------------------------------|------------------------------|
| NCT04735471 , NCT04911478     | 2021 | Recruiting | Ex vivo activated and expanded Vδ1 T cells, followed by depletion of ab T cells (ADI-001)          | Allogeneic   | PB          | Anti-CD20 CAR (3H7-CD8 HTM-BBz)      | 1           | Dose escalation: 30 x 10 <sup>6</sup> cells , 100 x 10 <sup>6</sup> cells, 300 x 10 <sup>6</sup> cells, 1 x 10 <sup>9</sup> cells                                                                                         | Single or multiple infusions           | Follicular lymphoma, MCL, MZL, burkitt lymphoma, mediastinal lymphoma, DLBCL, NHL                | n=16<br>Efficacy<br>11 CR: 69%<br>1 PR: 6%<br>2 SD: 13%<br>2 PD: 12.5%<br>Safety and toxicity<br>No DLT, GvHD, Grade 3 or higher CRS or ICANS reported. | <a href="https://investor.adicetbio.com/news-releases/news-release-details/adicet-bio-reports-positive-data-ongoing-adi-001-phase-1-trial">https://investor.adicetbio.com/news-releases/news-release-details/adicet-bio-reports-positive-data-ongoing-adi-001-phase-1-trial</a><br><a href="https://www.adicetbio.com/file.cfm/42/docs/adi-001_poster_isct_2022b.pdf">https://www.adicetbio.com/file.cfm/42/docs/adi-001_poster_isct_2022b.pdf</a> | Adicet Bio, Inc              |
| NCT05400603                   | 2022 | Recruiting | γδ T cells in combination with dinutuximab, temozolomide, irinotecan and zoledronate (Vδ2 T cells) | Allogeneic   | PB          | nil                                  | 1           | Dose escalation: first dose level of 3 x 10 <sup>6</sup> cells/kg, second dose level of 3 x 10 <sup>6</sup> cells/kg, third dose level of 1 x 10 <sup>7</sup> cells/kg, fourth dose level of 3 x 10 <sup>7</sup> cells/kg | up to 4 (1-week interval)              | R/r neuroblastoma (pediatric)                                                                    | No published results.                                                                                                                                   |                                                                                                                                                                                                                                                                                                                                                                                                                                                    | Expression Therapeutics      |
| NCT05653271                   | 2022 | Recruiting | Vδ2 T cells (ACE1831) or ACE1831 and obinutuzumab                                                  | Allogeneic   | PB          | anti-CD20 antibody conjugated        | 1           | Not published                                                                                                                                                                                                             | Not published                          | B cell lymphoma, NHL, DLBCL, primary mediastinal large B cell lymphoma, MZL, follicular lymphoma | No published results.                                                                                                                                   |                                                                                                                                                                                                                                                                                                                                                                                                                                                    | Acepodia Biotech, Inc.       |
| NCT04764513                   | 2021 | Recruiting | Ex vivo expanded γδ T cells (expansion from same donors as HSCT)                                   | Allogeneic   | PB          | nil                                  | 1 & 2       | Dose escalation, 2×10 <sup>6</sup> , 1×10 <sup>7</sup> and 5×10 <sup>7</sup> cells/kg                                                                                                                                     | 3 cohorts dose escalation; 5 infusions | Hematological malignancies after allogeneic HSCT: AML, ALL, MDS, lymphoma                        | No published results.                                                                                                                                   |                                                                                                                                                                                                                                                                                                                                                                                                                                                    | Chinese PLA General Hospital |



## Gamma/delta T cells in immunotherapy

| ClinicalTrials.gov Identifier | Year | Status     | Cell type(s) infused                                                                                                                  | Donor source              | Cell source | Modification of cells, if applicable | Trial phase    | No. of cells infused per patient                                                                                                | No. of infusions                                             | Condition/disease                                                 | Outcome               | Reference (if available) | Organiser                                                                        |
|-------------------------------|------|------------|---------------------------------------------------------------------------------------------------------------------------------------|---------------------------|-------------|--------------------------------------|----------------|---------------------------------------------------------------------------------------------------------------------------------|--------------------------------------------------------------|-------------------------------------------------------------------|-----------------------|--------------------------|----------------------------------------------------------------------------------|
| NCT04765462                   | 2021 | Recruiting | Ex vivo expanded $\gamma\delta$ T cells (expansion from same donors as HSCT)                                                          | Allogeneic                | Not stated  | nil                                  | 1 & 2          | 2x10 <sup>6</sup> /kg, 1 x10 <sup>7</sup> /kg to 5x10 <sup>7</sup> /kg every 2-4 weeks to determine the recommended dose level. | Dosing every 2-4 weeks, number of doses not stated           | Malignant solid tumour                                            | No published results. |                          | Chinese PLA General Hospital                                                     |
| NCT05554939                   | 2022 | Recruiting | CAR $\gamma\delta$ T cells                                                                                                            | Allogeneic                | PB          | anti-CD19 CAR                        | 1 & 2          | 3 dose groups (2 x 10 <sup>6</sup> cells/kg, 6 x 10 <sup>6</sup> cells/kg, 1.8 x 10 <sup>7</sup> cells/kg)                      | 3                                                            | R/r B cell NHL                                                    | No published results. |                          | Chinese PLA General Hospital                                                     |
| NCT05886491                   | 2023 | Recruiting | Enriched for V $\delta$ 1+ $\gamma\delta$ T cells (GD $\times$ 012) after lymphodepleting chemotherapy (fludarabine/cyclophosphamide) | Allogeneic                | PB          | nil                                  | 1 & 2          | 3 dose groups (weight based dose)                                                                                               | Single infusion, with some patients eligible for second dose | AML                                                               | No published results. |                          | Takeda Pharmaceutical Company Limited (acquired GammaDelta Therapeutics Limited) |
| NCT03849651                   | 2019 | Recruiting | TCR $\alpha\beta$ -depleted hematopoietic cell transplantation with additional memory cell DLI and selected use of blinatumomab       | Allogeneic/haploidentical | PB          | nil                                  | 2              | Not published                                                                                                                   | Single                                                       | ALL, AML, MDS, NK cell Leukemia, Hodgkin lymphoma, NHL, JMML, CML | No published results. |                          | St. Jude Children's Research Hospital                                            |
| NCT05358808                   | 2022 | Recruiting | V $\delta$ 2 T cells (TCB-008)                                                                                                        | Allogeneic                | PB          | nil                                  | 2              | 7 x 10 <sup>7</sup> or 7 x 10 <sup>8</sup> cells                                                                                | Single                                                       | AML                                                               | No published results. |                          | TC BioPharm<br>Royal Marsden Hospital London                                     |
| NCT05686538                   | 2023 | Recruiting | Innate donor lymphocyte infusion enriched in NK and $\gamma\delta$ T cells                                                            | Allogeneic                | PB/BM       | nil                                  | 2 & 3          | >10 <sup>7</sup> NK cells/kg and >10 <sup>6</sup> TCRgd cells/kg                                                                | Single                                                       | AML, MDS                                                          | No published results. |                          | Rigshospitalet                                                                   |
| NCT05388305                   | 2022 | Recruiting | CAR $\gamma\delta$ T cells                                                                                                            | Allogeneic                | Not stated  | anti-CD123 CAR                       | Not applicable | Not published                                                                                                                   | Not published                                                | R/r AML                                                           | No published results. |                          | Hebei Senlang Biotechnology Inc., Ltd                                            |

## Gamma/delta T cells in immunotherapy

| ClinicalTrials.gov Identifier | Year | Status                                                | Cell type(s) infused                                                                                              | Donor source                                                                                | Cell source | Modification of cells, if applicable                 | Trial phase | No. of cells infused per patient                                                                                                                       | No. of infusions                               | Condition/disease                                                        | Outcome               | Reference (if available) | Organiser                                   |
|-------------------------------|------|-------------------------------------------------------|-------------------------------------------------------------------------------------------------------------------|---------------------------------------------------------------------------------------------|-------------|------------------------------------------------------|-------------|--------------------------------------------------------------------------------------------------------------------------------------------------------|------------------------------------------------|--------------------------------------------------------------------------|-----------------------|--------------------------|---------------------------------------------|
| NCT05302037                   | 2022 | Not yet recruiting                                    | CAR $\gamma\delta$ T cells                                                                                        | Allogeneic                                                                                  | PB          | NKG2DL-targeting CAR                                 | 1           | Dose escalation: 1 x 10 <sup>7</sup> , 1 x 10 <sup>8</sup> , 3 x 10 <sup>8</sup> or 1 x 10 <sup>9</sup> per infusion<br>Same Dose: 1 x 10 <sup>9</sup> | 4 (1-week interval)                            | Advanced solid tumours or haematological malignancies                    | No published results. |                          | CytoMed Therapeutics Pte Ltd                |
| NCT03939585                   | 2023 | Not yet recruiting                                    | NK/ $\gamma\delta$ T cell-enriched product (donor lymphocytes depleted of TCR- $\alpha\beta$ T cells and B cells) | Allogeneic (HLA matched sibling donors or partially matched, related haploidentical donors) | PB          | nil                                                  | 1           | Not published                                                                                                                                          | Single                                         | Allogeneic stem cell transplant candidate<br><br>AML, ALL, MDS, MPN, LPD | No published results. |                          | Leland Metheny                              |
| NCT04806347                   | 2023 | Not yet recruiting                                    | TCR $\alpha\beta$ +/CD19+ depleted HSC graft                                                                      | Allogeneic (closely matched unrelated donors or haploidentical related donors)              | PB          | nil                                                  | 1           | Not published                                                                                                                                          | Not published                                  | Blood disease                                                            | No published results. |                          | University of Wisconsin, Madison            |
| NCT05664243                   | 2023 | Not yet recruiting                                    | $\gamma\delta$ T cells (DeltEx) (INB-400)                                                                         | Allogeneic                                                                                  | PB          | genetically-modified (drug resistance immunotherapy) | 1 & 2       | Not published                                                                                                                                          | 6 (4-week interval)                            | Recurrent or newly diagnosed glioblastoma                                | No published results. |                          | IN8Bio Inc                                  |
| NCT00562666                   | 2008 | Terminated                                            | $\gamma\delta$ T cells                                                                                            | Autologous                                                                                  | PB          | nil                                                  | 1           | 5 x 10 <sup>8</sup> or 10 x 10 <sup>8</sup>                                                                                                            | Single (hepatic intra arterial administration) | HCC                                                                      | No published results. |                          | Rennes University Hospital<br>Innate Pharma |
| NCT05001451                   | 2021 | Terminated (business decision, not related to safety) | Enriched for V $\delta$ 1+ $\gamma\delta$ T cells (GDX012)                                                        | Allogeneic                                                                                  | PB          | nil                                                  | 1           | Not published                                                                                                                                          | Single                                         | AML                                                                      | No published results. |                          | GammaDelta Therapeutics Limited             |

## Gamma/delta T cells in immunotherapy

| ClinicalTrials.gov Identifier | Year | Status                     | Cell type(s) infused                    | Donor source                     | Cell source | Modification of cells, if applicable | Trial phase   | No. of cells infused per patient                                                                                                                                                                                               | No. of infusions                                   | Condition/disease                                                                              | Outcome               | Reference (if available) | Organiser                                                                                                        |
|-------------------------------|------|----------------------------|-----------------------------------------|----------------------------------|-------------|--------------------------------------|---------------|--------------------------------------------------------------------------------------------------------------------------------------------------------------------------------------------------------------------------------|----------------------------------------------------|------------------------------------------------------------------------------------------------|-----------------------|--------------------------|------------------------------------------------------------------------------------------------------------------|
| NCT05628545                   | 2021 | Withdrawn (COVID Pandemic) | $\gamma\delta$ T cells (GDKM-100)       | Allogeneic                       | Not stated  | nil                                  | 1 & 2         | 3 dose groups (2 $\times$ 10 <sup>8</sup> cells/person, 5 $\times$ 10 <sup>8</sup> cells/person, 10 $\times$ 10 <sup>8</sup> cells/person at 1-3 infusion, 4-6 infusion and 7-9 infusion) or 10 x 10 <sup>8</sup> cells/person | up to 9                                            | Advanced HCC                                                                                   | No published results. |                          | Guangdong GD Kongming Biotech LLC                                                                                |
| NCT02459067                   | 2015 | Terminated                 | $\gamma\delta$ T cells (ImmuniCell®)    | Autologous                       | PB          | nil                                  | 2             | Intra-patient dose escalation to achieve a total dose of 30 x 10 <sup>9</sup> $\gamma\delta$ T cells.                                                                                                                          | 6 (2-week interval)                                | Malignant melanoma, NSCLC, RCC                                                                 | No published results. |                          | TC BioPharm                                                                                                      |
| NCT04700319                   | 2019 | Unknown                    | CAR $\gamma\delta$ T cells              | Autologous                       | PB          | CD19/CD20 CAR                        | Early phase 1 | 0.2-5 $\times$ 10 <sup>6</sup> cells/kg                                                                                                                                                                                        | Single                                             | Advanced CD19/CD20 <sup>+</sup> B cell line recurrent or refractory hematological malignancies | No published results. |                          | PersonGen BioTherapeutics (Suzhou) Co., Ltd. Anhui Provincial Hospital                                           |
| NCT04028440                   | 2019 | Unknown                    | $\gamma\delta$ T cells                  | Autologous                       | PB          | nil                                  | Early phase 1 | 1~2 $\times$ 10 <sup>9</sup> per infusion                                                                                                                                                                                      | 2 infusions x 3 (4-week interval)                  | NHL, r/r B cell NHL, CLL, PTCL                                                                 | No published results. |                          | Beijing GD Initiative Cell Therapy Technology Co., Ltd.                                                          |
| NCT04518774                   | 2020 | Unknown                    | Ex-vivo expanded $\gamma\delta$ T cells | Allogeneic (blood-related donor) | PB          | nil                                  | Early phase 1 | Dose escalation, 1 x 10 <sup>7</sup> , 3 x 10 <sup>7</sup> , 9 x 10 <sup>7</sup> cells/kg                                                                                                                                      | 3 cycles x 2 infusions per cycle (4-week interval) | HCC                                                                                            | No published results. |                          | Beijing 302 Hospital Chinese Academy of Medical Sciences Beijing GD Initiative Cell Therapy Technology Co., Ltd. |
| NCT02656147                   | 2017 | Unknown                    | CAR $\gamma\delta$ T cells              | Allogeneic                       | Not stated  | Anti-CD19-CAR                        | 1             | Not published                                                                                                                                                                                                                  | Not published                                      | Leukemia, lymphoma                                                                             | No published results. |                          | Beijing Doing Biomedical Co., Ltd.                                                                               |
| NCT04008381                   | 2019 | Unknown                    | Ex-vivo expanded $\gamma\delta$ T cells | Allogeneic (blood-related donor) | PB          | nil                                  | 1             | Dose escalation, 2 x 10 <sup>6</sup> , 4 x 10 <sup>6</sup> , 8 x 10 <sup>6</sup> cells/kg                                                                                                                                      | Not published                                      | AML                                                                                            | No published results. |                          | Wuhan Union Hospital, China                                                                                      |
| NCT04107142                   | 2019 | Unknown                    | CAR $\gamma\delta$ T cells              | Allogeneic/haploidentical        | PB          | NKG2DL-targeting CAR                 | 1             | 3 dose levels: 3 x 10 <sup>8</sup> , 1 x 10 <sup>9</sup> , 3 x 10 <sup>9</sup>                                                                                                                                                 | 4 (1-week interval)                                | Colorectal cancer, TNBC, sarcoma, NPC, prostate cancer, gastric cancer                         | No published results. |                          | CytoMed Therapeutics Pte Ltd                                                                                     |

## Gamma/delta T cells in immunotherapy

| ClinicalTrials.gov Identifier | Year | Status  | Cell type(s) infused                             | Donor source | Cell source | Modification of cells, if applicable | Trial phase                          | No. of cells infused per patient | No. of infusions | Condition/disease | Outcome               | Reference (if available) | Organiser                                         |
|-------------------------------|------|---------|--------------------------------------------------|--------------|-------------|--------------------------------------|--------------------------------------|----------------------------------|------------------|-------------------|-----------------------|--------------------------|---------------------------------------------------|
| NCT02585908                   | 2019 | Unknown | $\gamma\delta$ T cells with or without CIK cells | Autologous   | PB          | nil                                  | 1 & 2                                | Not published                    | Not published    | Gastric cancer    | No published results. |                          | Beijing Doing Biomedical Co., Ltd.                |
| NCT04796441                   | 2020 | Unknown | CAR $\gamma\delta$ T cells                       | Allogeneic   | PB          | anti-CD19 CAR                        | Not applicable                       | Not published                    | Not published    | Relapsed AML      | No published results. |                          | Hebei Senlang Biotechnology Inc., Ltd             |
| NCT03885076                   | 2018 | Unknown | CAR V $\delta$ 2 T cells                         | Autologous   | PB/BM       | anti CD33 CAR                        | Not applicable (observational study) | Not published                    | Not published    | AML (except M3)   | No published results. |                          | Royal Marsden NHS Foundation Trust<br>TC BioPharm |

Abbreviations: DC, dendritic cells; CIK, cytokine-induced killer cells; IRE, irreversible electroporation; HSCT, hematopoietic stem cell transplantation; HSC, hematopoietic stem cell; HLA, human leukocyte antigen; PBMC, peripheral blood mononuclear cells; BM, bone marrow; CAR, chimeric antigen receptor; MTD, maximum tolerated dose; HCC, hepatocellular carcinoma; CCA, cholangiocarcinoma; EGFR, epidermal growth factor receptor; NSCLC, non-small cell lung cancer; RCC, renal cell cancer; r/r, relapsed or refractory; NHL, non-Hodgkin lymphoma; PTCL, peripheral T cell lymphoma; AML, acute myeloid leukemia; CML, chronic myeloid leukemia; CLL, chronic lymphocytic leukemia; ALL, acute lymphoblastic leukemia; TNBC, triple-negative breast cancer; MDS, myelodysplastic syndromes; MPN, myeloproliferative neoplasm; LPD, lymphoproliferative disorders; MCL, mantle-cell lymphoma; MZL, marginal zone lymphoma; DLBCL, Diffuse large B cell lymphoma; NPC, nasopharyngeal carcinoma; JMML, Juvenile myelomonocytic leukemia; EGFR, epidermal growth factor receptor; TAC, T cell antigen coupler; CR, complete response; PR, partial response; SD, stable disease; MLFS, morphologic leukemia-free state; PFS, progression-free survival; OS, overall survival; DLT, dose-limiting toxicity; CRS, cytokine release syndrome; GvHD, graft-versus-host disease; ICANS, immune effector cell-associated neurotoxicity syndrome

## References

1. Bennouna J, Bompas E, Neidhardt EM, Rolland F, Philip I, Galéa C, et al. Phase-I study of Innacell gammadelta, an autologous cell-therapy product highly enriched in gamma9delta2 T lymphocytes, in combination with IL-2, in patients with metastatic renal cell carcinoma. *Cancer Immunol Immunother*. 2008 Nov;57(11):1599–609. doi: 10.1007/s00262-008-0491-8
2. Kobayashi H, Tanaka Y, Yagi J, Osaka Y, Nakazawa H, Uchiyama T, et al. Safety profile and anti-tumor effects of adoptive immunotherapy using gamma-delta T cells against advanced renal cell carcinoma: A pilot study. *Cancer Immunol Immunother*. 2007 Apr;56(4):469–76. doi: 10.1007/s00262-006-0199-6
3. Nakajima J, Murakawa T, Fukami T, Goto S, Kaneko T, Yoshida Y, et al. A phase I study of adoptive immunotherapy for recurrent non-small-cell lung cancer patients with autologous gammadelta T cells. *Eur J Cardiothorac Surg*. 2010 May 1;37(5):1191–7. doi: 10.1016/j.ejcts.2009.11.051
4. Nicol AJ, Tokuyama H, Mattarollo SR, Hagi T, Suzuki K, Yokokawa K, et al. Clinical evaluation of autologous gamma delta T cell-based immunotherapy for metastatic solid tumours. *Br J Cancer*. 2011 Sep 6;105(6):778–86. doi: 10.1038/bjc.2011.293
5. Alnaggar M, Xu Y, Li J, He J, Chen J, Li M, et al. Allogenic Vγ9Vδ2 T cell as new potential immunotherapy drug for solid tumor: a case study for cholangiocarcinoma. *J Immunother Cancer*. 2019 Feb 8;7(1):36. doi: 10.1186/s40425-019-0501-8
6. Lin M, Zhang X, Liang S, Luo H, Alnaggar M, Liu A, et al. Irreversible electroporation plus allogenic Vγ9Vδ2 T cells enhances antitumor effect for locally advanced pancreatic cancer patients. *Signal Transduct Target Ther*. 2020 Oct 23;5(1):1–9. doi: 10.1038/s41392-020-00260-1
7. Xu Y, Xiang Z, Alnaggar M, Kouakanou L, Li J, He J, et al. Allogeneic Vγ9Vδ2 T-cell immunotherapy exhibits promising clinical safety and prolongs the survival of patients with late-stage lung or liver cancer. *Cell Mol Immunol*. 2020 Sep 16;18(2):427–39. doi: 10.1038/s41423-020-0515-7
8. Vydra J, Cosimo E, Lesný P, Wanless RS, Anderson J, Clark AG, et al. A Phase I Trial of Allogeneic γδ T Lymphocytes From Haploidentical Donors in Patients With Refractory or Relapsed Acute Myeloid Leukemia. *Clin Lymphoma Myeloma Leuk*. 2023 May 1;23(5):e232–9. doi: 10.1016/j.clml.2023.02.003
9. Nabors LB, Lamb LS, Beelen MJ, Pillay T, Haak M ter, Youngblood S, et al. Phase 1 trial of drug resistant immunotherapy: A first-in-class combination of MGMT-modified γδ t cells and temozolomide chemotherapy in newly diagnosed glioblastoma. *Journal of Clinical Oncology*. 2021 May 28;39(15\_suppl):2057–2057. doi: 10.1200/jco.2021.39.15\_suppl.2057
